# Supplementary material
Source: publisher figshare collection journal article supplement (https://frontiersin.figshare.com/ndownloader/files/23012285)
Supplement: Supplementary file [file 23012285]

## Supplementary Material

**Table 1 Supplemental Data 1.** Phage-origin peptides identified in *Streptococcus* spp. strains.

| Strain         | Protein              | Peptide                              | 100% bacteria homology with protein NCBI database                                                           | 100% phage homology with protein NCBI database |
|----------------|----------------------|--------------------------------------|-------------------------------------------------------------------------------------------------------------|------------------------------------------------|
| ST1_ATCC 19436 | Gp58-like protein    | M*SSAESAITQNATEISK                   | <i>Streptococcus suis</i>                                                                                   | <i>Streptococcus</i> phage phi30c              |
| ST1_ATCC 19436 | RecT protein         | NSSSGNLLSQC*TDESVYISLLDM*VAQGLSPAK K | <i>Streptococcus agalactiae</i>                                                                             | <i>Streptococcus</i> phage LYGO9               |
| ST1_ATCC 19436 | Tape measure protein | LNSTFRLQESQLGSNASESEK                | <i>Streptococcus pyogenes</i><br><i>Streptococcus gordonii</i>                                              | <i>Streptococcus</i> phage phi1207.3           |
| ST1_ATCC 19436 | Phage head protein   | WSGDNYSGRWDNTGELAR                   | <i>Streptococcus anginosus</i><br><i>Streptococcus intermedius</i>                                          |                                                |
| ST1_ATCC 19436 | Phage head protein   | LSM*AENGFTM*FDIPEPKAC*DICK           | <i>Streptococcus pyogenes</i><br><i>Streptococcus dysgalactiae</i>                                          |                                                |
| ST1_ATCC 19436 | Phage tail protein   | SNDLGLLLERERSIK                      | <i>Streptococcus pyogenes</i><br><i>Streptococcus equi subsp. equi</i><br><i>Streptococcus dysgalactiae</i> |                                                |

|                |                                                   |                                   |                                 |                                                                                                                                         |
|----------------|---------------------------------------------------|-----------------------------------|---------------------------------|-----------------------------------------------------------------------------------------------------------------------------------------|
| ST1_ATCC 19436 | Uncharacterized phage protein                     | RELVDKEDTQGLAIDAQFLYDC*K          | <i>Streptococcus suis</i>       |                                                                                                                                         |
| ST1_ATCC 19436 | Phage tail protein                                | RSVM*ELSYTLYLVKPSEEQLLSFLKLFLK    | <i>Streptococcus suis</i>       | <i>Streptococcus</i> phage phi-m46.1                                                                                                    |
| ST1_ATCC 19436 | Endopeptidase/<br>matrix- binding<br>protein EbhB | ITTGHISAARIGAEAITADKLK            | <i>Streptococcus suis</i>       | <i>Streptococcus</i> phage phi-SsUD.1<br><i>Streptococcus</i> phage phi-m46.1<br><i>Streptococcus</i> phage phiSC070807                 |
| ST1_ATCC 19436 | Phage minor structural protein GP20 family        | LIDAE LTKAGVRDAEIFGK              | <i>Streptococcus mitis</i>      |                                                                                                                                         |
| ST1_ATCC 19436 | Uncharacterized phage protein                     | VKEKIAAIVNDEELLAK                 |                                 | <i>Streptococcus</i> phage P4761,<br><i>Streptococcus</i> phage 73, <i>Streptococcus</i> phage TP-J34, <i>Streptococcus</i> phage P7952 |
| ST1_ATCC 19436 | Uncharacterized phage protein                     | M*EKLIESLDNLIM*IVK                | <i>Streptococcus pneumoniae</i> | <i>Streptococcus</i> phage IPP19                                                                                                        |
| ST2_CECT 183T  | Uncharacterized phage protein                     | TLITM*TEQIKNLTDDVK                | <i>Streptococcus pyogenes</i>   | <i>Streptococcus</i> phage 315.2,<br><i>Streptococcus</i> phage 315.6,<br><i>Streptococcus</i> phage 315.1                              |
| ST2_CECT 183T  | Phage tail protein                                | LAFSGAGNAVDVLKNVFSLAWM*GIQDVVKVAK | <i>Streptococcus suis</i>       |                                                                                                                                         |
| ST2_CECT 183T  | Phage envelope protein                            | AM*DGM*YEHINAFNYKAEDVIGVGKTK      | <i>Streptococcus suis</i>       | <i>Streptococcus</i> phage phiNJ2                                                                                                       |
| ST2_CECT 183T  | Minor phage structural protein                    | ISGITLSDTNVVAGNLISSEHFVQM*LSNIK   |                                 | <i>Streptococcus</i> phage P7954,<br><i>Streptococcus</i> phage TP-J34                                                                  |
| ST2_CECT 183T  | Phage replication protein                         | TFKGINTNNINTNISINNK               | <i>Streptococcus canis</i>      |                                                                                                                                         |

|               |                                                   |                                          |                                                                    |                                                                                                                                                                |
|---------------|---------------------------------------------------|------------------------------------------|--------------------------------------------------------------------|----------------------------------------------------------------------------------------------------------------------------------------------------------------|
| ST2_CECT 183T | Phage-related<br>chromosomal island<br>protein    | TWLDDAVSVDEAM*ALPENK                     | <i>Streptococcus pneumoniae</i>                                    |                                                                                                                                                                |
| ST2_CECT 183T | Tail fiber pblA<br>protein                        | M*ATNLGQAYVQIM*PSAK                      | <i>Streptococcus agalactiae</i>                                    |                                                                                                                                                                |
| ST3_CECT 926  | Head-tail connector<br>protein                    | TEGGIEVVYGENGLSTGLLQRIRM*HR              | <i>Streptococcus pneumoniae</i>                                    | <i>Streptococcus</i> phage IPP69                                                                                                                               |
| ST3_CECT 926  | Major tail protein                                | M*LANGITLSYGESKETYTKLVGLK                | <i>Streptococcus pneumoniae</i>                                    | <i>Streptococcus</i> phage phiARI0831b,<br><i>Streptococcus</i> phage phiARI0004,<br><i>Streptococcus</i> phage phiARI0746,<br><i>Streptococcus</i> phage IPP8 |
| ST3_CECT 926  | Phage tail assembly<br>chaperone protein          | LDDEAYDKLLDLNERTQEIAEK                   | <i>Streptococcus salivarius</i>                                    | <i>Streptococcus</i> virus 7201                                                                                                                                |
| ST3_CECT 926  | Phage integrase                                   | TKPVTVYNDNK                              | <i>Streptococcus Parauberis</i><br><i>Streptococcus agalactiae</i> |                                                                                                                                                                |
| ST3_CECT 926  | Phage capsid protein                              | DDIKGSVELM*LSVWGVQKK                     | <i>Streptococcus pyogenes</i>                                      |                                                                                                                                                                |
| ST3_CECT 926  | Phage repressor,<br>Cro/CI family                 | QASNLSQKDFFEKIVK                         | <i>Streptococcus suis</i>                                          |                                                                                                                                                                |
| ST3_CECT 926  | Phage-like HicB<br>family antitoxin               | NEDFEM*VYDSSKSFISM*VM*VDVAKYLGSQEP<br>VK | <i>Streptococcus suis</i>                                          |                                                                                                                                                                |
| ST4_DSM 6631  | Phage GDSL-like<br>family<br>lipase/acylhydrolase | LSDKPKSYTEILNNIINSQK                     | <i>Streptococcus pneumoniae</i>                                    | <i>Streptococcus</i> phage IPP24,<br><i>Streptococcus</i> phage IPP26                                                                                          |

|                               |                                   |                              |                                                                                                                    |                                                                                                                                                                                                                                                                                                                                                     |
|-------------------------------|-----------------------------------|------------------------------|--------------------------------------------------------------------------------------------------------------------|-----------------------------------------------------------------------------------------------------------------------------------------------------------------------------------------------------------------------------------------------------------------------------------------------------------------------------------------------------|
| ST4_DSM 6631                  | Phage protein<br>(DUF1372 domain) | DVVDGHYYVEVKPYGKFLVTK        | <i>Streptococcus suis</i>                                                                                          |                                                                                                                                                                                                                                                                                                                                                     |
| ST4_DSM 6631                  | Phage tail protein                | FQLALLNTTTTFAQYQC*SAYIDFEGQR | <i>Streptococcus thermophilus</i>                                                                                  | <i>Streptococcus</i> phage vB_SthS_VA460,<br><i>Streptococcus</i> phage P7953,<br><i>Streptococcus</i> phage P7952,<br><i>Streptococcus</i> phage P7954,<br><i>Streptococcus</i> phage P7951,<br><i>Streptococcus</i> virus phiAbc2,<br><i>Streptococcus</i> phage P7955,<br><i>Streptococcus</i> phage TP-J34,<br><i>Streptococcus</i> phage P4761 |
| ST4_DSM 6631                  | Uncharacterized<br>phage protein  | DNVLIETVKM*QGEQAM*QLVK       |                                                                                                                    | <i>Streptococcus</i> phage 20617,<br><i>Streptococcus</i> phage P7152,<br><i>Streptococcus</i> phage P7134,<br><i>Streptococcus</i> virus 9871,<br><i>Streptococcus</i> phage P0091,                                                                                                                                                                |
| ST5_DSM 6632                  | Phage repressor,<br>Cro/CI family | KERNLTQEEM*ADK               | <i>Streptococcus suis</i> ,                                                                                        | <i>Streptococcus</i> phage phiLP081102                                                                                                                                                                                                                                                                                                              |
| ST5_DSM 6632<br>and ST7_USC 3 | Phage tail fiber PblB             | DNFAISIKRNR                  | <i>Streptococcus mitis</i><br><br><i>Streptococcus<br/>pseudopneumoniae</i><br><br><i>Streptococcus pneumoniae</i> | <i>Streptococcus</i> phage SpSL1                                                                                                                                                                                                                                                                                                                    |
| ST5_DSM 6632                  | Uncharacterized<br>phage protein  | TTTELTTTHTVGDQKEM*VRM*NDR    | <i>Streptococcus pneumoniae</i><br><br><i>Mycobacterium tuberculosis</i>                                           | <i>Streptococcus</i> phage IPP16,<br><i>Streptococcus</i> phage K13,<br><i>Streptococcus</i> phage 34117                                                                                                                                                                                                                                            |
| ST6_USC 1                     | Uncharacterized<br>phage protein  | TEQLPFANTNLK                 | <i>Streptococcus pyogenes</i>                                                                                      |                                                                                                                                                                                                                                                                                                                                                     |
| ST7_USC 3                     | Major capsid protein              | KM*VEVGELEENPELGK            | <i>Streptococcus suis</i><br><br><i>Streptococcus plurextorum</i>                                                  |                                                                                                                                                                                                                                                                                                                                                     |

|           |                                                     |                          |                                       |                                            |
|-----------|-----------------------------------------------------|--------------------------|---------------------------------------|--------------------------------------------|
| ST7_USC 3 | DnaD and phage-associated domain-containing protein | IEEVKEEKISTSSQNSQNIK     | <i>Streptococcus henryi</i>           |                                            |
| ST7_USC 3 | Tape measure protein                                | VEIVQEKSNEVM*EK AIDAM*GR | <i>Streptococcus lutetiensis</i>      |                                            |
|           |                                                     |                          | <i>Streptococcus equinus</i>          |                                            |
| ST7_USC 3 | Phage integrase                                     | TLAKGEDNKLIFQTPK         | <i>Streptococcus mitis</i>            |                                            |
|           |                                                     |                          | <i>Streptococcus pseudopneumoniae</i> |                                            |
|           |                                                     |                          | <i>Streptococcus infantis</i>         |                                            |
|           |                                                     |                          | <i>Streptococcus oralis</i>           |                                            |
|           |                                                     |                          | <i>Streptococcus parasanguinis</i>    |                                            |
| ST8_USC 5 | Phage protein, HK97 Gp10 family protein             | M*AIKWQGM*EKL VATISNAHPK | <i>Streptococcus suis</i>             |                                            |
| ST8_USC 5 | Gp348 protein, Mayor capsid protein                 | QLGTKLSYITGASGQSVALK     |                                       | <i>Streptococcus virus Sfi11</i>           |
| ST8_USC 5 | Phage integrase                                     | QLFSELGSNSPRIVFSTPTK     | <i>Streptococcus parauberis</i>       |                                            |
| ST8_USC 5 | Uncharacterized phage protein                       | NKGENQKMALSTR            | <i>Streptococcus suis</i> ,           | <i>Streptococcus</i> phage phiZJ20091101-2 |

|                              |                                |                                 |                                                                                                    |                                                                                                                                                                                                                                                                                                                                                                                                                                                                                                                                                                                                                                                                                                                                                                                                                                                                                         |
|------------------------------|--------------------------------|---------------------------------|----------------------------------------------------------------------------------------------------|-----------------------------------------------------------------------------------------------------------------------------------------------------------------------------------------------------------------------------------------------------------------------------------------------------------------------------------------------------------------------------------------------------------------------------------------------------------------------------------------------------------------------------------------------------------------------------------------------------------------------------------------------------------------------------------------------------------------------------------------------------------------------------------------------------------------------------------------------------------------------------------------|
| ST8_USC 5                    | Uncharacterized phage protein  | YPNSFTAYIM*DVKGC*K              | <i>Streptococcus thermophilus</i>                                                                  | <i>Streptococcus</i> phage D1811,<br><i>Streptococcus</i> phage TP-778L,<br><i>Streptococcus</i> phage D5842,<br><i>Streptococcus</i> phage vB_SthS_VA460,<br><i>Streptococcus</i> phage P9902,<br><i>Streptococcus</i> phage P9852,<br><i>Streptococcus</i> phage P8922,<br><i>Streptococcus</i> phage P9851,<br><i>Streptococcus</i> phage P8921,<br><i>Streptococcus</i> phage P7152,<br><i>Streptococcus</i> phage P7154,<br><i>Streptococcus</i> phage P7151,<br><i>Streptococcus</i> phage P5652,<br><i>Streptococcus</i> phage P5651,<br><i>Streptococcus</i> phage P4761,<br><i>Streptococcus</i> phage P0095,<br><i>Streptococcus</i> phage P0093,<br><i>Streptococcus</i> phage P0091,<br><i>Streptococcus</i> phage P0092,<br><i>Streptococcus</i> virus 9874,<br><i>Streptococcus</i> virus DT1,<br><i>Streptococcus</i> virus 7201,<br><i>Streptococcus</i> virus phiAbc2. |
| ST9_USC 13                   | Prophage pi2 protein           | M*DDLFDShSIFFDKVETYISTEK        | <i>Streptococcus oralis</i><br><i>Streptococcus mitis</i>                                          |                                                                                                                                                                                                                                                                                                                                                                                                                                                                                                                                                                                                                                                                                                                                                                                                                                                                                         |
| ST9_USC 13                   | Uncharacterized phage protein  | EVAKIRFEDNEYDVHTVK              |                                                                                                    | <i>Streptococcus</i> phage phi5218                                                                                                                                                                                                                                                                                                                                                                                                                                                                                                                                                                                                                                                                                                                                                                                                                                                      |
| ST10_USC 52                  | Phage repressor, Cro/CI family | YPDRFIPFEDEPRIVGLVVGHFH*PVIGG   | <i>Streptococcus salivarius</i><br><i>Streptococcus sanguinis</i><br><i>Streptococcus gordonii</i> |                                                                                                                                                                                                                                                                                                                                                                                                                                                                                                                                                                                                                                                                                                                                                                                                                                                                                         |
| ST10_USC 52 and ST14_USC 158 | Gp58-like protein              | HAQGDVGWNINSVTQRIVPANINAESEIWSK | <i>Streptococcus suis</i>                                                                          | <i>Streptococcus</i> phage phi20c,<br><i>Streptococcus</i> phage phi7917                                                                                                                                                                                                                                                                                                                                                                                                                                                                                                                                                                                                                                                                                                                                                                                                                |

|             |                                            |                                   |                                                                                                                      |                                         |
|-------------|--------------------------------------------|-----------------------------------|----------------------------------------------------------------------------------------------------------------------|-----------------------------------------|
| ST10_USC 52 | Uncharacterized phage protein              | AGNNEIVFIC*KC*IC*GNIIESYTSLLR     | <i>Streptococcus parauberis</i>                                                                                      |                                         |
| ST10_USC 52 | Major tail protein                         | M*TVKGTALIGLKSVTIR                | <i>Streptococcus pneumoniae</i>                                                                                      | <i>Streptococcus</i> phage IPP62        |
| ST10_USC 52 | Phage integrase family                     | RFLQQAIEKVIDSNGYITAK              | <i>Streptococcus mitis</i>                                                                                           |                                         |
| ST12_USC 83 | Phage cytosine-specific methyltransferase  | FLDLFAGIGGFRFGM*ESAGHEC*IGFC*EIDK | <i>Streptococcus pneumoniae</i><br><i>Streptococcus oralis</i> ,                                                     | <i>Streptococcus</i> phage phiARI0746   |
| ST12_USC 83 | Phage endopeptidase                        | QKEFEETLRNLAIPPEAIK               | <i>Streptococcus canis</i>                                                                                           |                                         |
| ST12_USC 83 | PBSX family phage terminase                | LAQAQAEAGDQTAEAQVKAISEIIGKM*ENAVS | <i>Streptococcus oralis</i>                                                                                          |                                         |
| ST12_USC 83 | Uncharacterized protein phage phiARI0131-1 | KDSVNGPAPIPAGTYPVVLKK             | <i>Streptococcus pneumoniae</i>                                                                                      | <i>Streptococcus</i> phage phiARI0131-1 |
| ST13_USC 84 | PBSX family phage terminase                | VGRSLKDSIFEDVK                    | <i>Streptococcus agalactiae</i><br><i>Enterococcus faecalis</i>                                                      |                                         |
| ST13_USC 84 | Phage endopeptidase                        | LVLTPTKAKM*EAQTFNLSK              | <i>Streptococcus equi subsp. equi</i><br><i>Streptococcus equi subsp. zooepidemicus</i><br><i>Streptococcus equi</i> | <i>Streptococcus</i> phage P9           |
| ST13_USC 84 | Head tail connector protein                | RSQEM*SKAPIYAIYK                  | <i>Streptococcus pneumoniae</i><br><i>Staphylococcus warneri</i><br><i>Staphylococcus</i> spp.                       | Uncultured Caudovirales phage           |

|               |                                 |                                 |                                   |                                                                          |
|---------------|---------------------------------|---------------------------------|-----------------------------------|--------------------------------------------------------------------------|
| ST13_USC 84   | Phage tail tape-measure protein | DDSDGAGSGGSGGGKKGK              | <i>Streptococcus oralis</i>       |                                                                          |
| ST13_USC 89   | Uncharacterized phage protein   | QM*KDYIVENQGLIGKR               | <i>Streptococcus pneumoniae</i>   |                                                                          |
| ST13_USC 84   | Uncharacterized phage protein   | IENM*LLAQENRRLEEQAK             | <i>Streptococcus suis</i> ,       | <i>Streptococcus</i> phage phi20c                                        |
| ST14_CECT 758 | Phage integrase family          | QFVFTYNDRSNNINLPLHVDYLNRYRM*K   | <i>Streptococcus thermophilus</i> |                                                                          |
|               |                                 |                                 | <i>Streptococcus salivarius</i>   |                                                                          |
| ST14_CECT 758 | Phage tail tape-measure protein | KWAM*EYGLSTKSVNSGM*QELVK        | <i>Streptococcus parauberis</i>   |                                                                          |
|               |                                 |                                 | <i>Streptococcus salivarius</i>   |                                                                          |
| ST14_CECT 758 | Phage repressor, Cro/CI family  | KLAYVKPRM*GM*NAFGKPGLTYEGIGESK  | <i>Streptococcus anginosus</i>    |                                                                          |
|               |                                 |                                 | <i>Streptococcus sanguinis</i>    |                                                                          |
| ST14_CECT 758 | Uncharacterized phage protein   | KLETAVVM*LVAENAM*QAKALR         | <i>Streptococcus pyogenes</i>     |                                                                          |
| ST14_CECT 758 | Gp58-like protein               | HAQGDVGWNINSVTQRIVPANINAESEIWSK | <i>Streptococcus suis</i> ,       | <i>Streptococcus</i> phage phi20c,<br><i>Streptococcus</i> phage phi7917 |

(M\* methionine oxidation; C\* carbamidomethylation of Cys)



**Table 2 in Supplemental Data 1** Linage, authors and accession number of studied bacteriophages.

| Phage name                         | Linage                                                                                                               | Accession number | Authors                   |
|------------------------------------|----------------------------------------------------------------------------------------------------------------------|------------------|---------------------------|
| <i>Streptococcus</i> virus phiAbc2 | dsDNA viruses, no RNA stage; <i>Caudovirales</i> ; <i>Siphoviridae</i> ; Sfi21dt1 virus                              | NC_013645.1      | Guglielmotti et al., 2005 |
| <i>Streptococcus</i> phage 315.1   | dsDNA viruses, no RNA stage; <i>Caudovirales</i> ; <i>Podoviridae</i> ; unclassified <i>Podoviridae</i>              | NC_004584.1      | Beres et al., 2002        |
| <i>Streptococcus</i> phage 34117   | unclassified bacterial viruses                                                                                       | FR671407.1       | Croucher et al., 2011     |
| <i>Streptococcus</i> phage 73      | dsDNA viruses, no RNA stage; <i>Caudovirales</i> ; <i>Siphoviridae</i> ; unclassified <i>Siphoviridae</i>            | KT717083.1       | Achigar et al., 2017      |
| <i>Streptococcus</i> phage D5842   | dsDNA viruses, no RNA stage; <i>Caudovirales</i> ; <i>Siphoviridae</i> ; Sfi21dt1 virus; unclassified Sfi21dt1 virus | MH000602.1       | Hynes et al., 2018        |
| <i>Streptococcus</i> phage IPP26   | unclassified bacterial viruses                                                                                       | KY065467.1       | Brueggemann et al., 2017  |
| <i>Streptococcus</i> phage IPP8    | unclassified bacterial viruses                                                                                       | KY065450.1       | Brueggemann et al., 2017  |
| <i>Streptococcus</i> phage K13     | unclassified bacterial viruses                                                                                       | NC_024357.1      | Croucher et al., 2014     |
| <i>Streptococcus</i> phage P0091   | dsDNA viruses no RNA stage; <i>Caudovirales</i> ; <i>Siphoviridae</i> ; Sfi21dt1 virus; unclassified Sfi21dt1 virus  | KY705251.1       | McDonnell et al., 2017    |
| <i>Streptococcus</i> phage P0092   | dsDNA viruses no RNA stage; <i>Caudovirales</i> ; <i>Siphoviridae</i>                                                | KY705252.1       | McDonnell et al., 2017    |
| <i>Streptococcus</i> phage P0093   | dsDNA viruses no RNA stage; <i>Caudovirales</i> ; <i>Siphoviridae</i>                                                | KY705253.1       | McDonnell et al., 2017    |

|                                  |                                                                                                                     |            |                        |
|----------------------------------|---------------------------------------------------------------------------------------------------------------------|------------|------------------------|
| <i>Streptococcus</i> phage P0095 | dsDNA viruses no RNA stage; <i>Caudovirales</i> ; <i>Siphoviridae</i>                                               | KY705255.1 | McDonnell et al., 2017 |
| <i>Streptococcus</i> phage P4761 | dsDNA viruses no RNA stage; <i>Caudovirales</i> ; <i>Siphoviridae</i> ; Sfi21dt1 virus; unclassified Sfi21dt1 virus | KY705258.1 | McDonnell et al., 2017 |
| <i>Streptococcus</i> phage P5651 | dsDNA viruses no RNA stage; <i>Caudovirales</i> ; <i>Siphoviridae</i> ; Sfi21dt1 virus; unclassified Sfi21dt1 virus | KY705260.1 | McDonnell et al., 2017 |
| <i>Streptococcus</i> phage P5652 | dsDNA viruses no RNA stage; <i>Caudovirales</i> ; <i>Siphoviridae</i> ; Sfi21dt1virus; unclassified Sfi21dt1 virus  | KY705261.1 | McDonnell et al., 2017 |
| <i>Streptococcus</i> phage P7134 | dsDNA viruses no RNA stage; <i>Caudovirales</i> ; <i>Siphoviridae</i> ; Sfi21dt1virus; unclassified Sfi21dt1 virus  | KY705264.1 | McDonnell et al., 2017 |
| <i>Streptococcus</i> phage P7151 | dsDNA viruses no RNA stage; <i>Caudovirales</i> ; <i>Siphoviridae</i> ; Sfi21dt1 virus; unclassified Sfi21dt1 virus | KY705265.1 | McDonnell et al., 2017 |
| <i>Streptococcus</i> phage P7152 | dsDNA viruses no RNA stage; <i>Caudovirales</i> ; <i>Siphoviridae</i> ; Sfi21dt1 virus; unclassified Sfi21dt1 virus | KY705266.1 | McDonnell et al., 2017 |
| <i>Streptococcus</i> phage P7154 | dsDNA viruses no RNA stage; <i>Caudovirales</i> ; <i>Siphoviridae</i> ; Sfi21dt1 virus; unclassified Sfi21dt1 virus | KY705267.1 | McDonnell et al., 2017 |
| <i>Streptococcus</i> phage P7951 | dsDNA viruses no RNA stage; <i>Caudovirales</i> ; <i>Siphoviridae</i> ; Sfi21dt1 virus; unclassified Sfi21dt1 virus | KY705277.1 | McDonnell et al., 2017 |
| <i>Streptococcus</i> phage P7952 | dsDNA viruses no RNA stage; <i>Caudovirales</i> ; <i>Siphoviridae</i> ; Sfi21dt1 virus; unclassified Sfi21dt1 virus | KY705278.1 | McDonnell et al., 2017 |
| <i>Streptococcus</i> phage P7953 | dsDNA viruses no RNA stage; <i>Caudovirales</i> ; <i>Siphoviridae</i> ; Sfi21dt1 virus; unclassified Sfi21dt1 virus | KY705279.1 | McDonnell et al., 2017 |

|                                       |                                                                                                                     |             |                        |
|---------------------------------------|---------------------------------------------------------------------------------------------------------------------|-------------|------------------------|
| <i>Streptococcus</i> phage P7954      | dsDNA viruses no RNA stage; <i>Caudovirales</i> ; <i>Siphoviridae</i> ; Sfi21dt1 virus; unclassified Sfi21dt1 virus | KY705280.1  | McDonnell et al., 2017 |
| <i>Streptococcus</i> phage P7955      | dsDNA viruses no RNA stage; <i>Caudovirales</i> ; <i>Siphoviridae</i> ; Sfi21dt1 virus; unclassified Sfi21dt1 virus | KY705281.1  | McDonnell et al., 2017 |
| <i>Streptococcus</i> phage P8921      | dsDNA viruses no RNA stage; <i>Caudovirales</i> ; <i>Siphoviridae</i> ; Sfi21dt1 virus; unclassified Sfi21dt1 virus | KY705282.1  | McDonnell et al., 2017 |
| <i>Streptococcus</i> phage P8922      | dsDNA viruses no RNA stage; <i>Caudovirales</i> ; <i>Siphoviridae</i> ; Sfi21dt1 virus; unclassified Sfi21dt1 virus | KY705283.1  | McDonnell et al., 2017 |
| <i>Streptococcus</i> phage P9851      | dsDNA viruses no RNA stage; <i>Caudovirales</i> ; <i>Siphoviridae</i> ; Sfi21dt1 virus; unclassified Sfi21dt1 virus | KY705284.1  | McDonnell et al., 2017 |
| <i>Streptococcus</i> phage P9852      | dsDNA viruses no RNA stage; <i>Caudovirales</i> ; <i>Siphoviridae</i> ; Sfi21dt1 virus; unclassified Sfi21dt1 virus | KY705285.1  | McDonnell et al., 2017 |
| <i>Streptococcus</i> phage P9902      | dsDNA viruses no RNA stage; <i>Caudovirales</i> ; <i>Siphoviridae</i> ; Sfi21dt1 virus; unclassified Sfi21dt1 virus | KY705289.1  | McDonnell et al., 2017 |
| <i>Streptococcus</i> phage phi7917    | dsDNA viruses no RNA stage; <i>Caudovirales</i> ; <i>Podoviridae</i> ; unclassified <i>Podoviridae</i>              | KC348601.1  | Tang et al., 2013      |
| <i>Streptococcus</i> phage phiARI0004 | unclassified bacterial viruses                                                                                      | NC_031920.1 | Croucher et al., 2016  |
| <i>Streptococcus</i> phage phiARI0746 | dsDNA viruses no RNA stage; <i>Caudovirales</i> ; <i>Siphoviridae</i> ; unclassified <i>Siphoviridae</i>            | NC_031907.1 | Croucher et al., 2016  |
| <i>Streptococcus</i> phage phi-m46.1  | unclassified bacterial viruses                                                                                      | FM864213.1  | Brenciani et al., 2010 |

|                                        |                                                                                                                     |             |                              |
|----------------------------------------|---------------------------------------------------------------------------------------------------------------------|-------------|------------------------------|
| <i>Streptococcus</i> phage phiSC070807 | dsDNA viruses no RNA stage; <i>Caudovirales</i> ; unclassified <i>Caudovirales</i>                                  | KT336321.1  | Huang and Wang (unpublished) |
| <i>Streptococcus</i> phage TP-778L     | dsDNA viruses no RNA stage; <i>Caudovirales</i> ; <i>Siphoviridae</i> ; unclassified <i>Siphoviridae</i>            | NC_022776.1 | Ali et al., 2014             |
| <i>Streptococcus</i> phage TP-J34      | dsDNA viruses no RNA stage; <i>Caudovirales</i> ; <i>Siphoviridae</i> ; unclassified <i>Siphoviridae</i>            | HE861935.1  | Neve et al., 1998            |
| <i>Streptococcus</i> virus 7201        | dsDNA viruses no RNA stage; <i>Caudovirales</i> ; <i>Siphoviridae</i> ; Sfi21dt1virus                               | NC_002185.1 | Stanley et al., 2000         |
| <i>Streptococcus</i> virus 9871        | dsDNA viruses no RNA stage; <i>Caudovirales</i> ; <i>Siphoviridae</i> ; unclassified <i>Siphoviridae</i>            | NC_031069.1 | McDonnell et al., 2016       |
| <i>Streptococcus</i> virus 9874        | dsDNA viruses no RNA stage; <i>Caudovirales</i> ; <i>Siphoviridae</i> ; unclassified <i>Siphoviridae</i>            | NC_031023.1 | McDonnell et al., 2016       |
| <i>Streptococcus</i> virus DT1         | dsDNA viruses no RNA stage; <i>Caudovirales</i> ; <i>Siphoviridae</i> ; Sfi21dt1 virus                              | AF085222.2  | Tremblay and Moineau 1999    |
| <i>Streptococcus</i> phage 20617       | unclassified bacterial viruses                                                                                      | NC_023503.1 | Arioli et al., 2018          |
| <i>Streptococcus</i> phage 315.2       | dsDNA viruses no RNA stage; <i>Caudovirales</i> ; <i>Podoviridae</i> ; unclassified <i>Podoviridae</i>              | NC_004585.1 | Beres et al., 2002           |
| <i>Streptococcus</i> phage 315.6       | dsDNA viruses no RNA stage; <i>Caudovirales</i> ; <i>Podoviridae</i> ; unclassified <i>Podoviridae</i>              | NC_004589.1 | Beres et al., 2002           |
| <i>Streptococcus</i> phage D1811       | dsDNA viruses no RNA stage; <i>Caudovirales</i> ; <i>Siphoviridae</i> ; Sfi21dt1 virus; unclassified Sfi21dt1 virus | MH000604.1  | Hynes et al., 2018           |
| <i>Streptococcus</i> phage IPP16       | unclassified bacterial viruses                                                                                      | KY065457.1  | Brueggemann et al., 2017     |

|                                         |                                                                                                          |             |                              |
|-----------------------------------------|----------------------------------------------------------------------------------------------------------|-------------|------------------------------|
| <i>Streptococcus</i> phage IPP19        | dsDNA viruses no RNA stage; <i>Caudovirales</i> ; unclassified <i>Caudovirales</i>                       | Y065460.1   | Brueggemann A B et al., 2017 |
| <i>Streptococcus</i> phage IPP24        | unclassified bacterial viruses                                                                           | KY065465.1  | Brueggemann et al., 2017     |
| <i>Streptococcus</i> phage IPP62        | unclassified bacterial viruses                                                                           | KY065498.1  | Brueggemann et al., 2017     |
| <i>Streptococcus</i> phage IPP69        | unclassified bacterial viruses                                                                           | KY065505.1  | Brueggemann et al., 2017     |
| <i>Streptococcus</i> phage LYGO9        | dsDNA viruses no RNA stage; <i>Caudovirales</i> ; <i>Siphoviridae</i> ; unclassified <i>Siphoviridae</i> | JX409894.1  | Bai et al., 2016             |
| <i>Streptococcus</i> phage P9           | dsDNA viruses no RNA stage; <i>Caudovirales</i> ; <i>Siphoviridae</i> ; unclassified <i>Siphoviridae</i> | NC_009819.1 | Tiwari et al., 2006          |
| <i>Streptococcus</i> phage phi1207.3    | dsDNA viruses no RNA stage; <i>Caudovirales</i> ; unclassified <i>Caudovirales</i>                       | AY657002.1  | Iannelli et al., 2014        |
| <i>Streptococcus</i> phage phi20c       | unclassified bacterial viruses                                                                           | KC348598.1  | Tang et al., 2013            |
| <i>Streptococcus</i> phage phi30c       | dsDNA viruses no RNA stage; <i>Caudovirales</i> ; <i>Podoviridae</i> ; unclassified <i>Podoviridae</i>   | KC348599.1  | Tang et al., 2013            |
| <i>Streptococcus</i> phage phi5218      | dsDNA viruses no RNA stage; <i>Caudovirales</i> ; <i>Podoviridae</i> ; unclassified <i>Podoviridae</i>   | KC348600.1  | Tang et al., 2013            |
| <i>Streptococcus</i> phage phiARI0131-1 | unclassified bacterial viruses                                                                           | NC_031901.1 | Croucher et al., 2016        |
| <i>Streptococcus</i> phage phiARI0831b  | unclassified bacterial viruses                                                                           | KT337369.1  | Croucher et al., 2016        |

Supplementary Material

|                                            |                                                                                                                     |             |                                           |
|--------------------------------------------|---------------------------------------------------------------------------------------------------------------------|-------------|-------------------------------------------|
| <i>Streptococcus</i> phage phiLP081102     | dsDNA viruses no RNA stage; <i>Caudovirales</i> ; <i>Podoviridae</i> ; unclassified <i>Podoviridae</i>              | KX077890.1  | Huang et al., 2016a                       |
| <i>Streptococcus</i> phage phiNJ2          | dsDNA viruses no RNA stage; <i>Caudovirales</i> ; <i>Siphoviridae</i> ; unclassified <i>Siphoviridae</i>            | NC_019418.1 | Tang et al., 2013                         |
| <i>Streptococcus</i> phage phi-SsUD.1      | dsDNA viruses no RNA stage; <i>Caudovirales</i> ; unclassified <i>Caudovirales</i>                                  | FN997652.1  | Palmieri et al., 2011                     |
| <i>Streptococcus</i> phage SpSL1           | dsDNA viruses no RNA stage; <i>Caudovirales</i> ; <i>Siphoviridae</i> ; unclassified <i>Siphoviridae</i>            | NC_027396.1 | Furi Clockie and Oggioni<br>(Unpublished) |
| <i>Streptococcus</i> phage vB_SthS_VA460   | dsDNA viruses no RNA stage; <i>Caudovirales</i> ; <i>Siphoviridae</i> ; Sfi21dt1 virus; unclassified Sfi21dt1 virus | MG708275.1  | da Silva Duarte et al., 2018              |
| <i>Streptococcus</i> virus Sfi11           | dsDNA viruses no RNA stage; <i>Caudovirales</i> ; <i>Siphoviridae</i> ; Sfi11 virus                                 | NC_002214.1 | Lucchini et al., 1999b                    |
| <i>Streptococcus</i> phage phiZJ20091101-2 | Viruses; unclassified bacterial viruses                                                                             | KX077893.1  | Huang et al., 2016a                       |
